# Supplementary material for: Cell Entry of Avian Reovirus Modulated by Cell-Surface Annexin A2 and Adhesion G Protein-Coupled Receptor Latrophilin-2 Triggers Src and p38 MAPK Signaling Enhancing Caveolin-1- and Dynamin 2-Dependent Endocytosis
Source: PubMed Central journal article supplement (PMC10269738; doi:10.1128/spectrum.00009-23), 2023-04-25
Supplement: spectrum.00009-23-s0001.pdf [file spectrum.00009-23-s0001.pdf]

## Supplementary information

Cell entry of avian reovirus modulated by cell-surface annexin A2 and adhesion G protein-coupled receptor Latrophilin 2 triggers Src and p38 MAPK signaling enhancing caveolin 1- and dynamin 2-dependent endocytosis

Wei-Ru Huang<sup>a,b</sup>, Yi-Ying Wu<sup>a, b</sup>, Tsai-Ling Liao<sup>c,d,e</sup>, Brent L. Nielsen<sup>f</sup>, Hung-Jen Liu<sup>a, b,c,d,g\*</sup>

<sup>a</sup>Institute of Molecular Biology, National Chung Hsing University, Taichung, Taiwan

<sup>b</sup>The iEGG and Animal Biotechnology Center, National Chung Hsing University, Taichung, Taiwan

<sup>c</sup>Rong Hsing Research Center for Translational Medicine, National Chung Hsing University, Taichung, Taiwan

<sup>d</sup>Ph.D Program in Translational Medicine, National Chung Hsing University, Taichung, Taiwan

<sup>e</sup>Department of Medical Research, Taichung Veterans General Hospital, Taichung, Taiwan

<sup>f</sup>Department of Microbiology and Molecular Biology, Brigham Young University, Provo, Utah, USA

<sup>g</sup>Department of Life Sciences, National Chung Hsing University, Taichung, Taiwan

### Corresponding author and address reprint requests:

Dr. Hung-Jen Liu, Institute of Molecular Biology, National Chung Hsing University, Taichung, Taiwan

Address: 145 Xingda Rd., South Dist., Taichung City 402, Taiwan

Tel:886-4-22840485 ext. 243; Fax: 886-4-22874879

E-mail: [hjliu5257@nchu.edu.tw](mailto:hjliu5257@nchu.edu.tw).

Table S1. The catalog numbers and dilution factor of the respective antibodies used in this study

| Antibodies                                                  | Catalog numbers | Clone name | Dilution factor | Manufacture    |
|-------------------------------------------------------------|-----------------|------------|-----------------|----------------|
| *Mouse anti-p17                                             | -               | -          | 2000            | Our laboratory |
| Mouse anti- $\sigma$ A                                      | -               | -          | 4000            | Our laboratory |
| Mouse anti- $\sigma$ C                                      | -               | -          | 4000            | Our laboratory |
| Rabbit anti-Annexin V                                       | ab108194        | EPR3980    | 2000            | abcam          |
| *Rabbit anti-LPHN2                                          | ab139498        | -          | 2000            | abcam          |
| Rabbit anti-Annexin A2                                      | 8235            | D11G2      | 2000            | Cell Signaling |
| Rabbit anti-p-Caveolin-1 (Y14)                              | 3251            | -          | 2000            | Cell Signaling |
| Rabbit anti-Caveolin-1                                      | 3238            | -          | 2000            | Cell Signaling |
| *Rabbit anti-Dynamin I/II                                   | 2342            | -          | 2000            | Cell Signaling |
| Rabbit anti-p-Src (Y416)                                    | 6943            | D49G4      | 1000            | Cell Signaling |
| Rabbit anti-Src                                             | 2123            | 32G6       | 2000            | Cell Signaling |
| *Rabbit anti-p-p38 (T180/Y182)                              | 9211            | -          | 2000            | Cell Signaling |
| Rabbit anti-p38 MAPK                                        | 8690            | D13E1      | 2000            | Cell Signaling |
| Rabbit anti-Vimentin                                        | 5741            | D21H3      | 2000            | Cell Signaling |
| Rabbit anti-Flotillin-2                                     | 3436            | C42A3      | 2000            | Cell Signaling |
| Rabbit anti-Ras                                             | 3339            | 27H5       | 2000            | Cell Signaling |
| Mouse anti-Csk                                              | sc-166560       | E-3        | 1000            | Santa Cruz     |
| Mouse anti-Cbp                                              | sc-365387       | G-8        | 1000            | Santa Cruz     |
| Mouse anti- $\beta$ -actin                                  | MAB1501         | C4         | 10000           | Millipore      |
| Goat anti-mouse IgG (H+L) HRP                               | 5220-0341       | -          | 5000            | SeraCare       |
| Goat anti-rabbit IgG (H+L) HRP                              | 5220-0336       | -          | 5000            | SeraCare       |
| Goat anti-mouse IgG (H+L)<br>FITC-Labeled, Alexa Fluor® 488 | 5230-0307       | -          | 500             | SeraCare       |

\*Polyclonal antibodies

# Figure S1

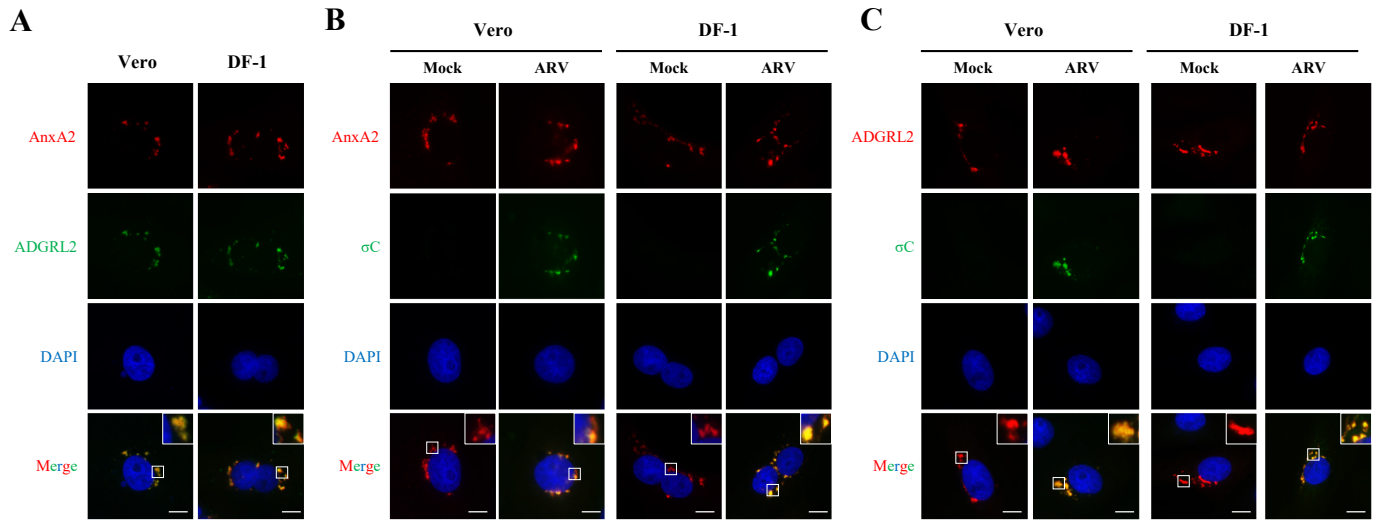

**Supplementary Fig. S1. Cell surface AnxA2 and  $\sigma$ C/ADGRL2 receptors are involved in ARV entry.** (A-C) To colocalize AnxA2/ADGRL2 (A),  $\sigma$ C/AnxA2 (B), and  $\sigma$ C/ADGRL2 (C), Vero and DF-1 cells were infected with ARV at MOI of 10 for 24 hours. Co-localization of AnxA2 and ADGRL2 and  $\sigma$ C/AnxA2 in cells stained with DAPI (blue), and antibodies specific for AnxA2 (red), ADGRL2 (green), and  $\sigma$ C (green). Enlarged images correspond to the region indicated by the white box in the merged image. The representative images are from three independent experiments. Scale bars, 20  $\mu$ m.

**Figure S2**

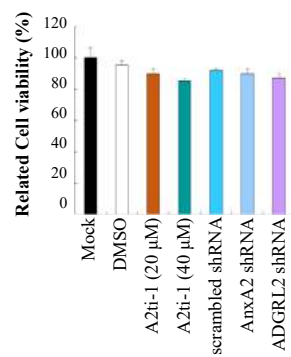

**Supplementary Fig. S2.** To investigate whether A2ti-1 inhibitor and shRNAs have deleterious effects on the cell, cell viability was assessed by MTT assay.

# Figure S3

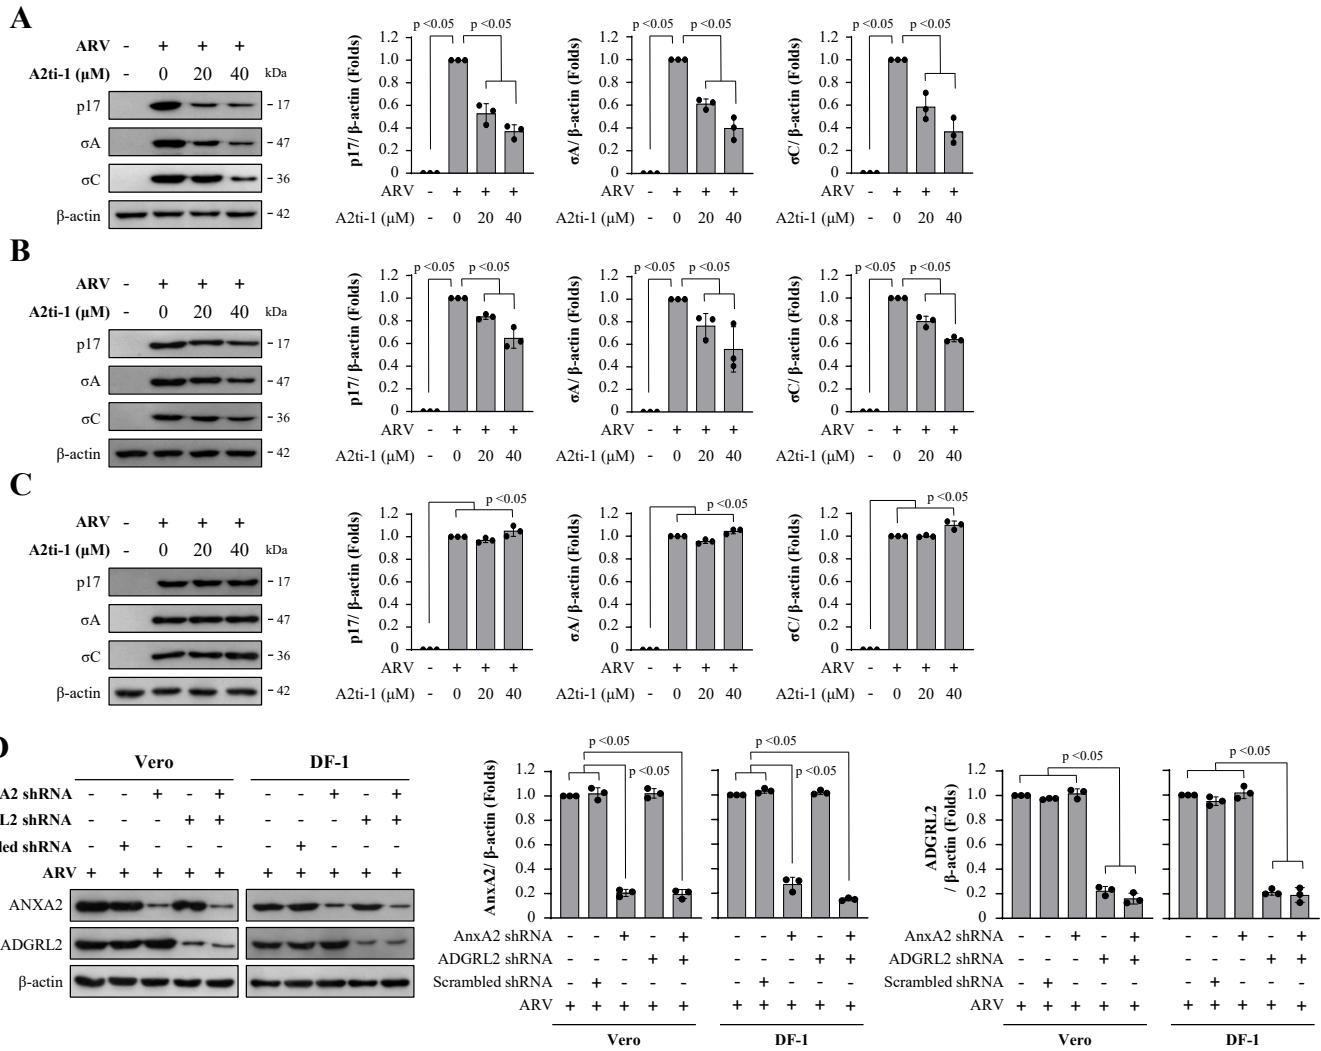

**Supplementary Fig. S3. Inhibition of cell-surface AnxA2 and ADGRL2 suppressed expression of viral proteins.** (A-C) Vero cells were pretreated with inhibitor A2ti-1 before (A), during (B), and after (C) infection for 2 hours. Cells were washed to remove the drug and further incubated with ARV at an MOI of 10 until 24 hours. The expression levels of viral proteins p17,  $\sigma$ A, and  $\sigma$ C were analyzed by Western blotting with the respective antibodies. (D) Since ADGRL2 inhibitor is not available, we used a shRNA to deplete the ADGRL2 gene. Cells were transfected with the indicated shRNAs for 6 h followed by infection with an MOI of 10 for 24 h. The protein levels were normalized to that for  $\beta$ -actin. The levels of the indicated proteins in the mock treatment were considered 1-fold. All experiments were performed in triplicate, and data are presented as the mean mean $\pm$ SE. An unpaired two-tailed Student's t-test was performed for between-group comparisons using GraphPad Prism software version 8. The image shown is from a single experiment that is representative of at least three separate experiments.

**Figure S4**

**A**

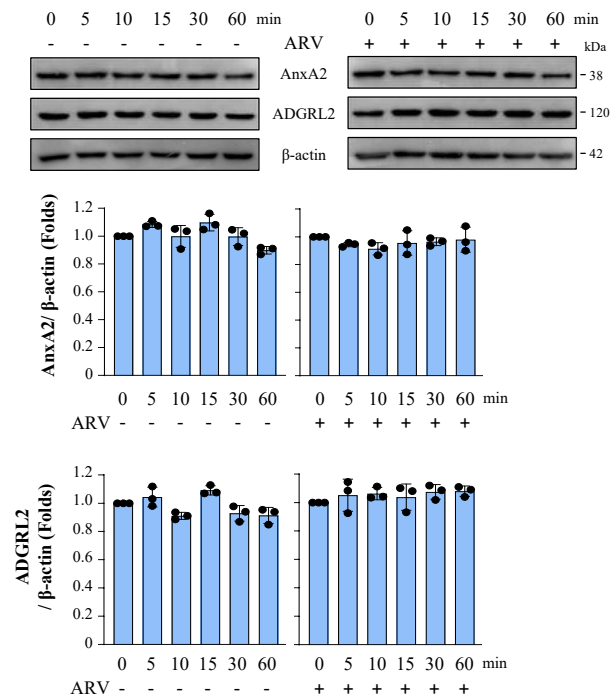

**B 15 min**

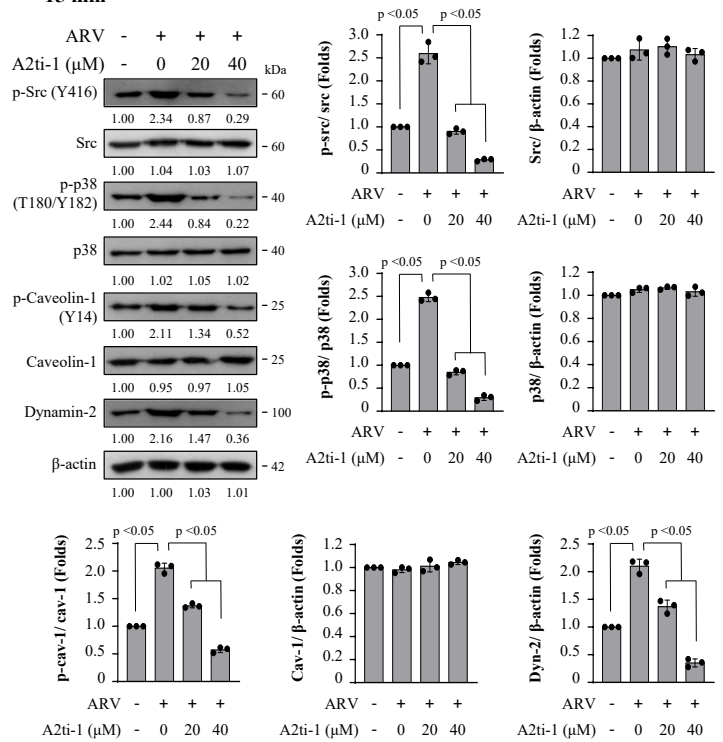

**C 30 min**

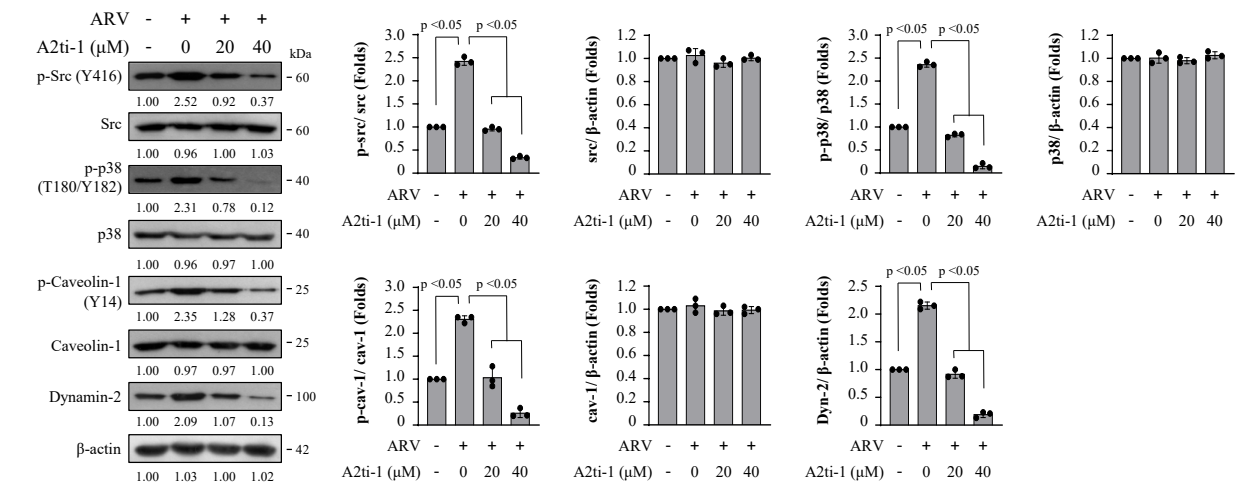

**D**

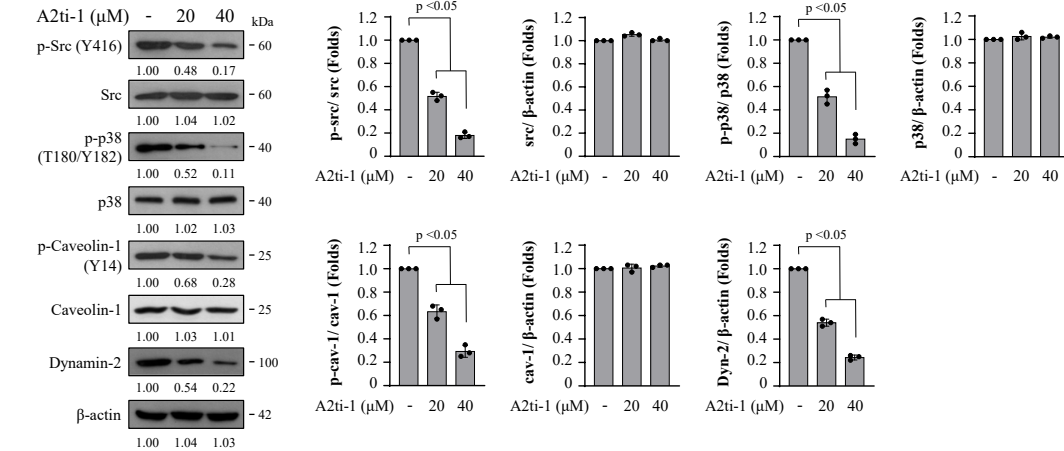

**E**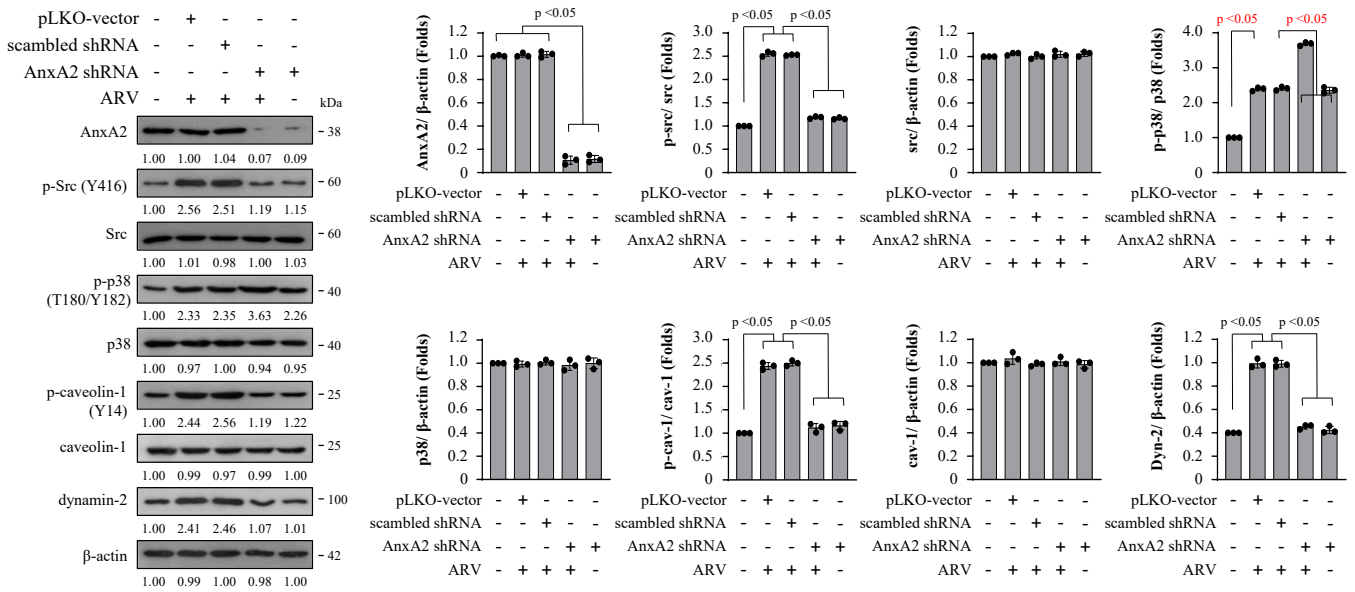**F**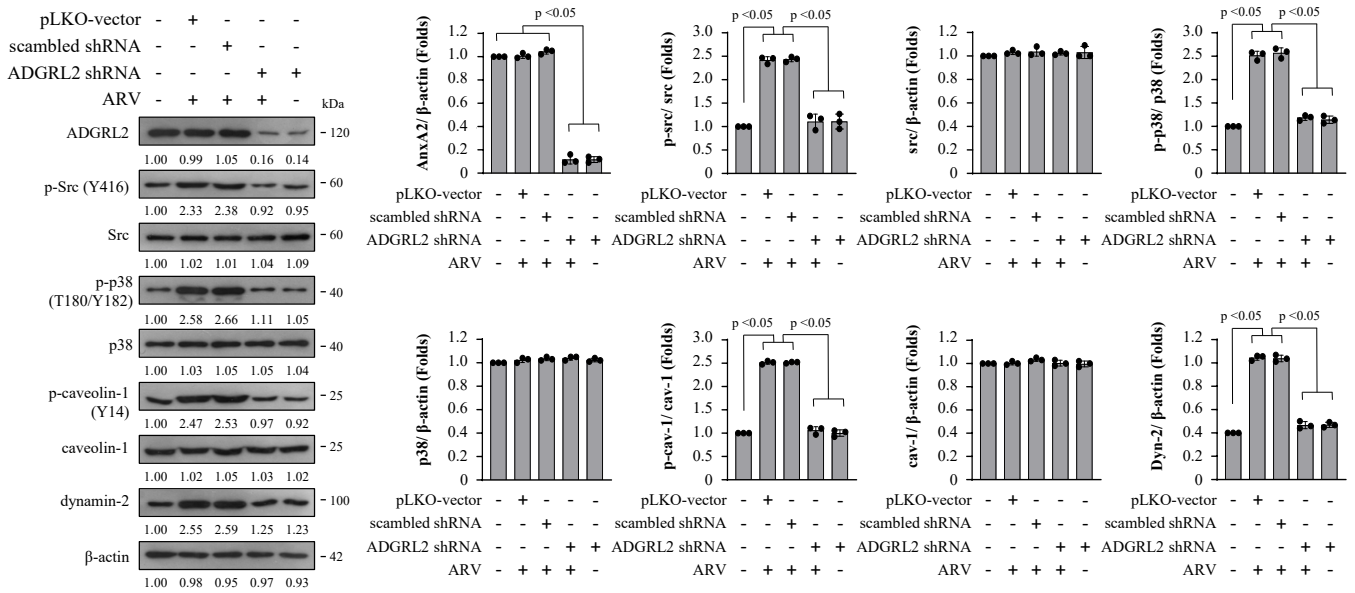

**Supplementary Fig. S4. ARV interaction with the cell-surface AnxA2 activates Src and p38, which enhance expression levels of cavolin-1 and dynamin 2.** (A) The levels of AnxA2 and ADGRL2 were examined in ARV-infected Vero cells at the indicated time points. (B-C) Vero cells were pretreated with inhibitor A2ti-1 for 1 hour followed by infection with ARV at an MOI of 10 for the indicated time points (15 and 30 min). (D) Vero cells were treated with inhibitor A2ti-1 for 1.5 hour without ARV. (E-F) Vero cells were transfected with the indicated shRNAs for 24 hours followed infection, with ARV at an MOI of 10 for 30 mins. Cell lysates were collected and immunoblotted with the respective antibody. The expression levels of the indicated proteins were analyzed by Western blotting with the respective antibodies and quantitated by densitometric analysis using ImageJ, normalized to  $\beta$ -actin. The levels of indicated proteins in the mock group was considered 1-fold. The predicted size of each protein was labeled at the right of gels and blots in kDa in each figure. All experiments were performed in triplicate, and data are presented as the mean  $\pm$  SE. An unpaired two-tailed Student's t-test was performed for between-group comparisons using GraphPad Prism software version 8. The image shown is from a single experiment that is representative of at least three separate experiments.

# Figure S5

**A**

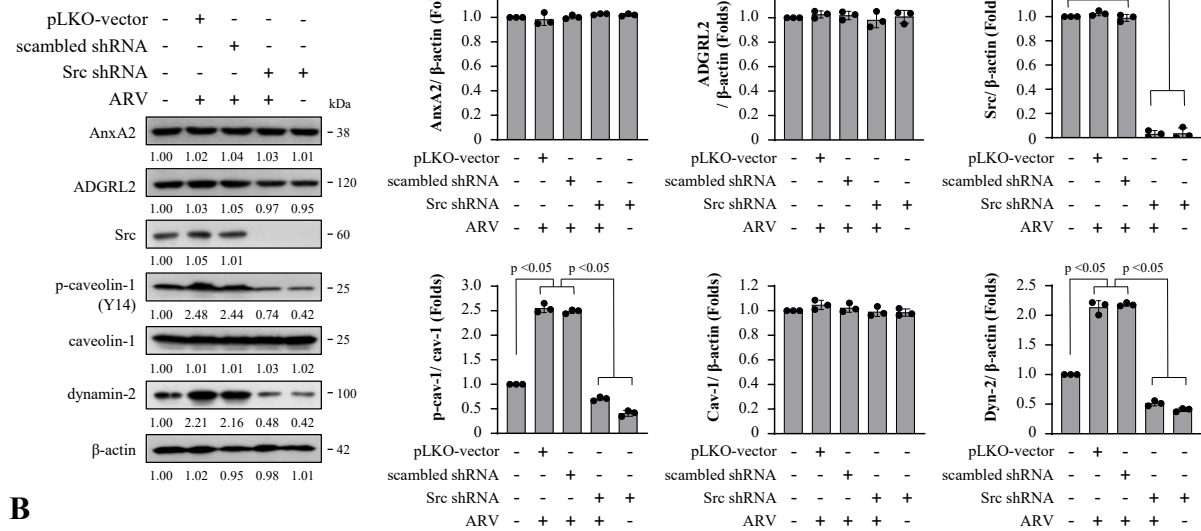

**B**

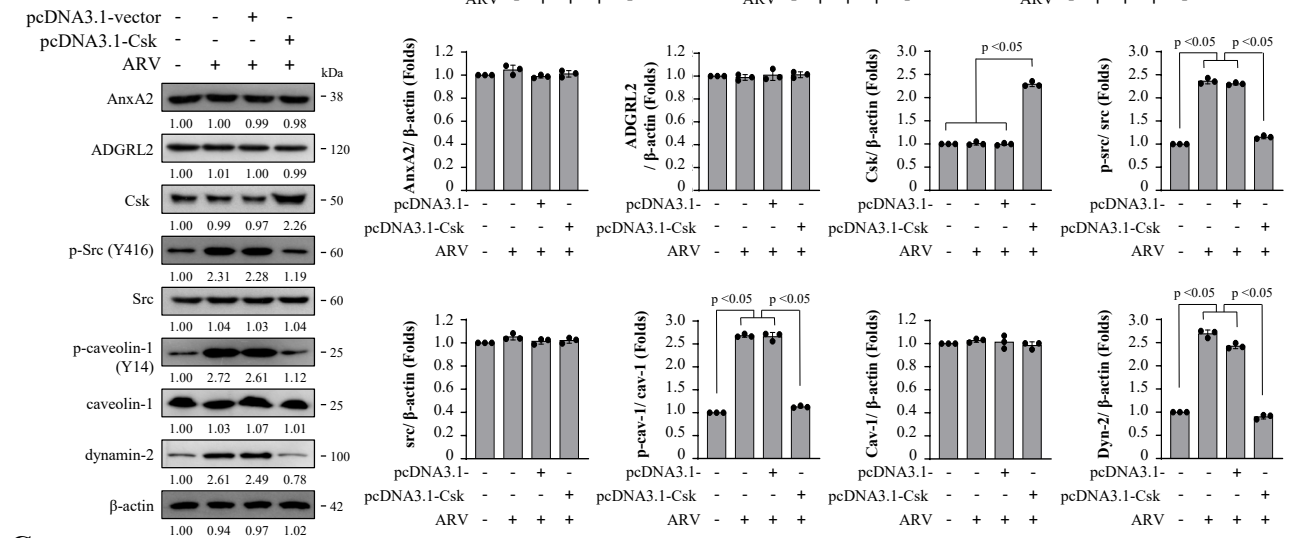

**C**

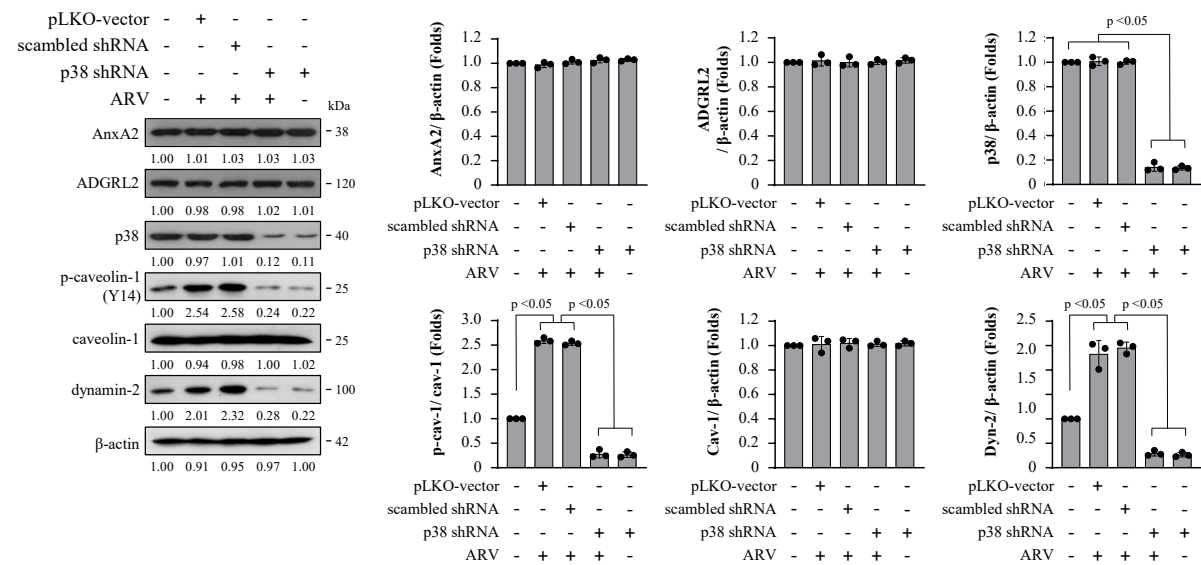

**Supplementary Fig. S5. Src and p38MAPK play an important role in regulating expression levels of cavolin-1 and dynamin 2.** (A-C) Vero cells were transfected with pcDNA3.1-Csk plasmid and different shRNAs for 6 hours followed by infection with ARV at an MOI of 10 for 24 hours. Cell lysates were collected at 24 hours post-infection and immunoblotted with respective antibodies. The protein levels were normalized to that for  $\beta$ -actin. The levels of the indicated proteins in the mock treatment were considered 1-fold. All experiments were performed in triplicate, and data are presented as the mean  $\pm$  SE. An unpaired two-tailed Student's t-test was performed for between-group comparisons using GraphPad Prism software version 8. The image shown is from a single experiment that is representative of at least three separate experiments.



**Figure S6**

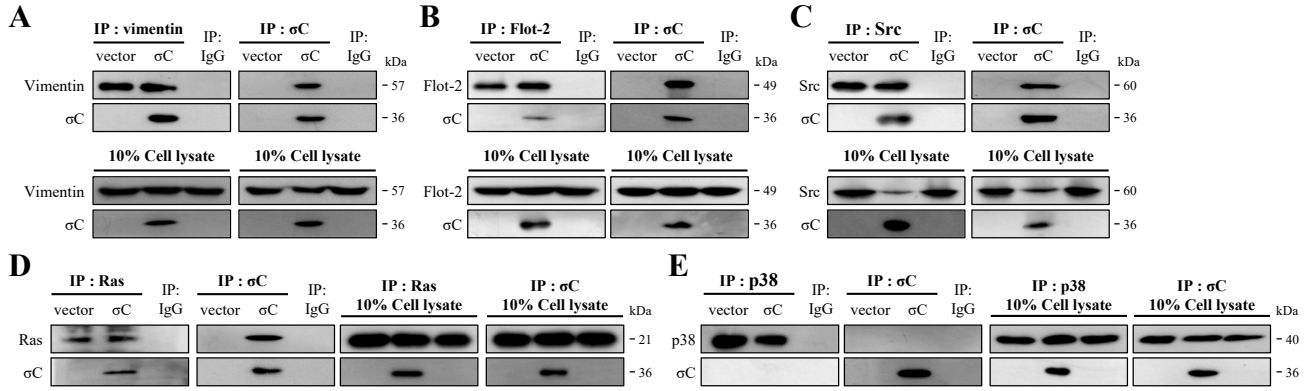

**Supplementary Fig. S6. ARV  $\sigma$ C interacts with cellular factors vimentin, Flot-2, Src, Ras, and p38MAPK.** (A-E) In co-immunoprecipitation experiments, Vero cells were transfected with the pCI-neo- $\sigma$ C vector for 24 h. Cells lysates were immunoprecipitated with the indicated antibodies. The immunoprecipitated proteins were detected with the indicated antibodies by Western blot assay. Rabbit IgG served as negative control. All experiments were conducted in three independent experiments.

**Figure S7**

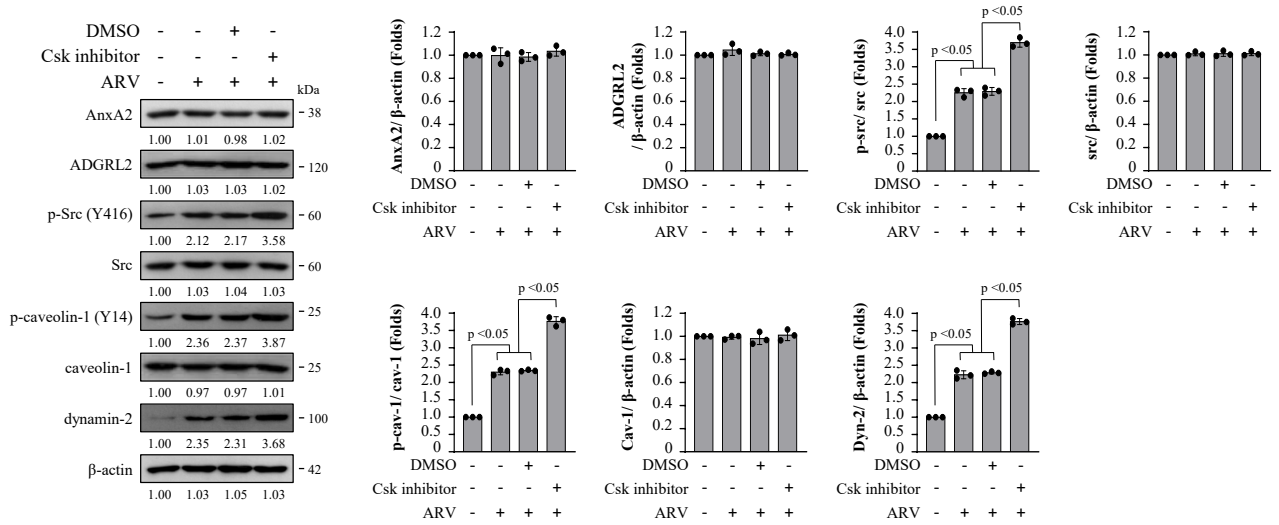

**Supplementary Fig. S7. ARV reduces Cbp-Csk interaction at the early stage of life cycle.** Vero cells were pretreated with the Csk inhibitor before infection for 2 hours. Cells were washed to remove the drug and further infected with ARV at an MOI of 10 for 24 hours. The expression levels of the indicated proteins were analyzed by Western blotting with the respective antibodies. The protein levels were normalized to that for  $\beta$ -actin. The levels of the indicated proteins in the mock treatment were considered 1-fold. All experiments were performed in triplicate, and data are presented as the mean  $\pm$  SE. An unpaired two-tailed Student's t-test was performed for between-group comparisons using GraphPad Prism software version 8. The image shown is from a single experiment that is representative of at least three separate experiments.

# Figure S8

## Figure 1A

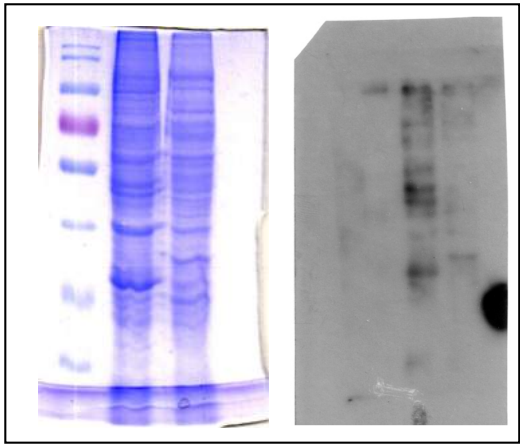

## Figure 2A

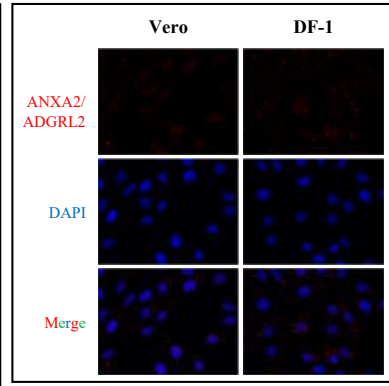

## Figure 1B

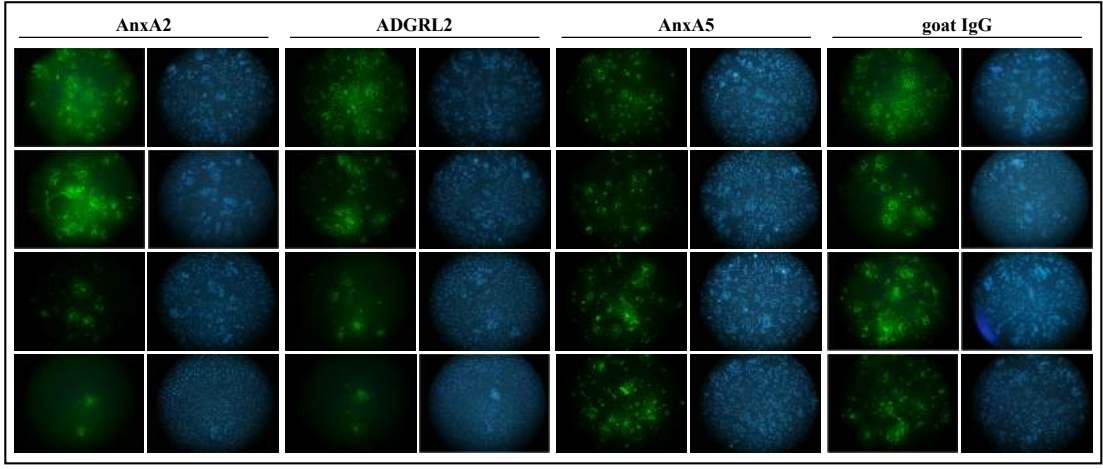

## Figure 2B

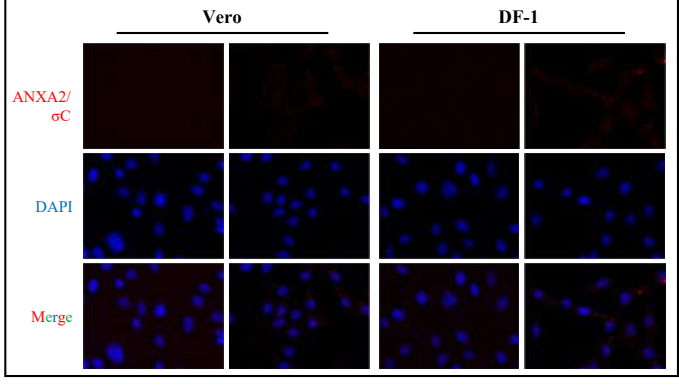

## Figure 2C

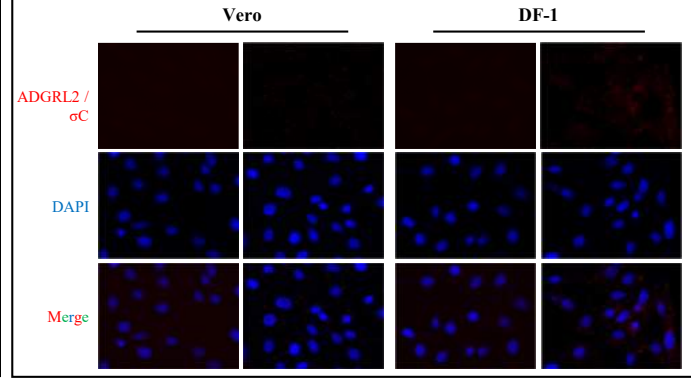

**Figure 2E**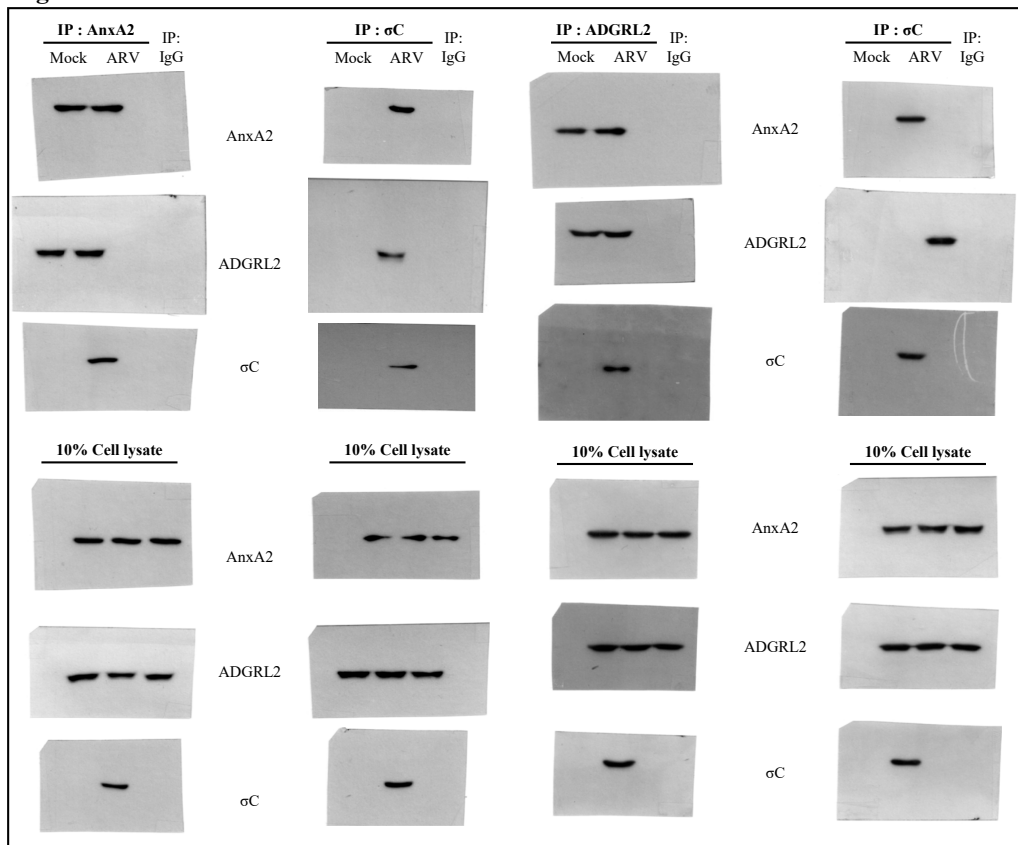**Figure 3B**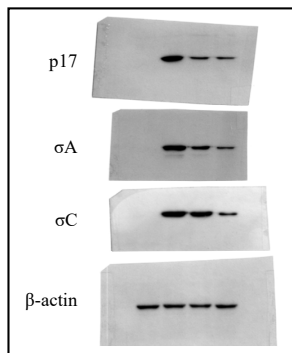**Figure 3C**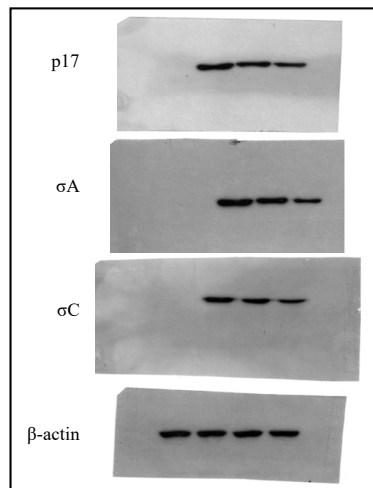**Figure 3D**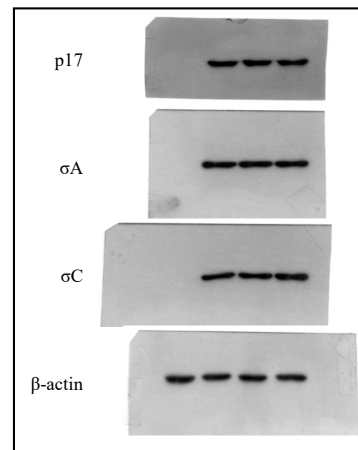**Figure 3E**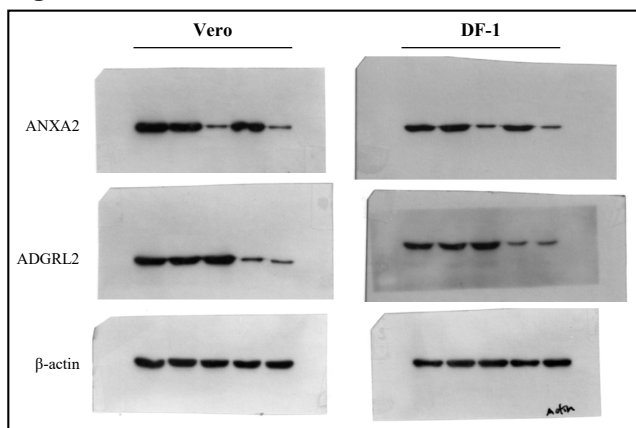**Figure 4A**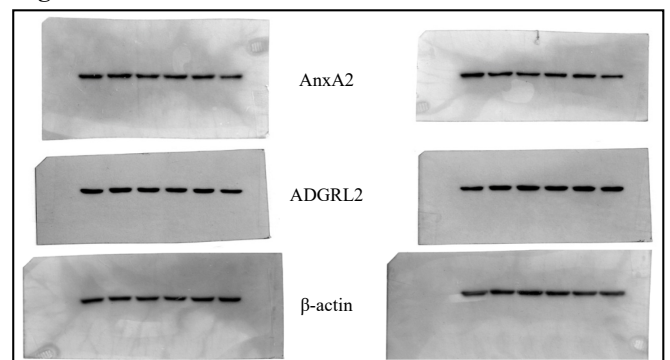

**Figure 4B**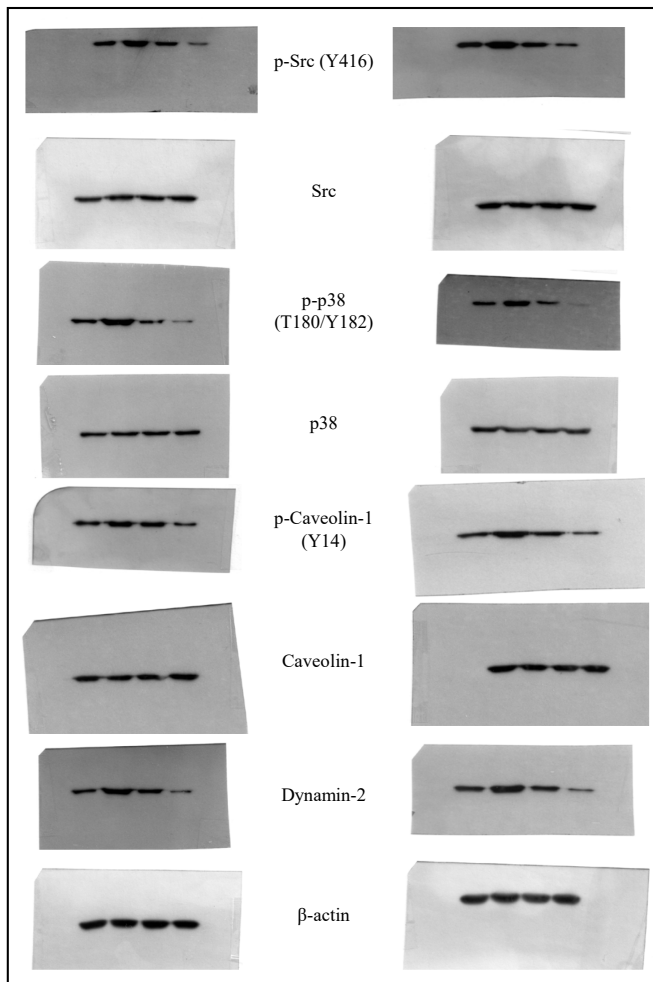**Figure 4C**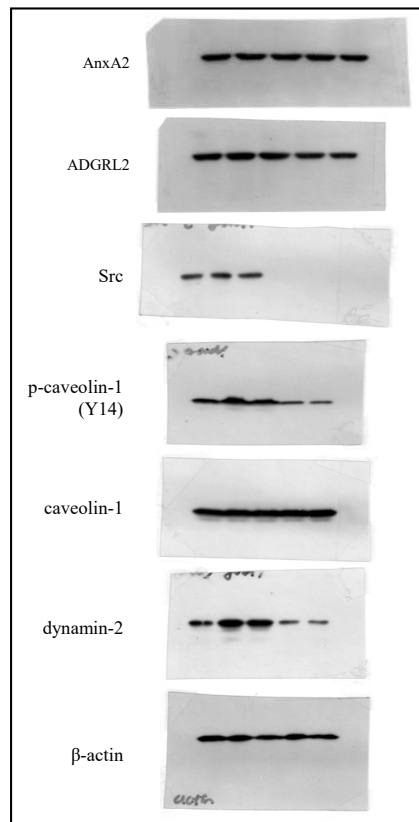**Figure 4E**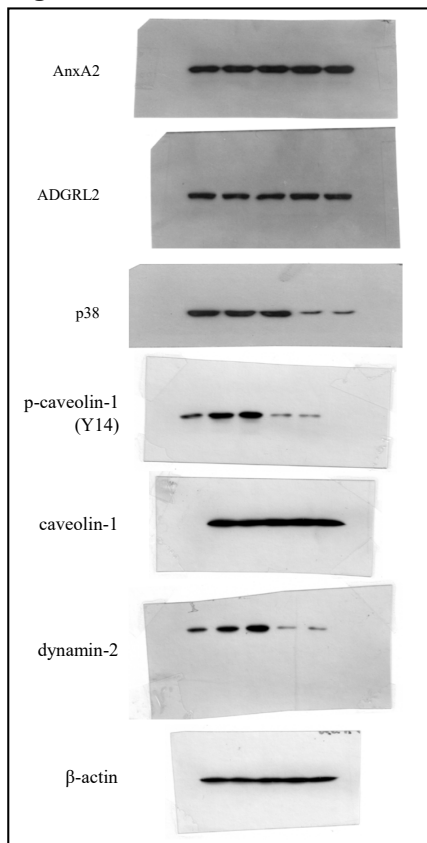**Figure 4D**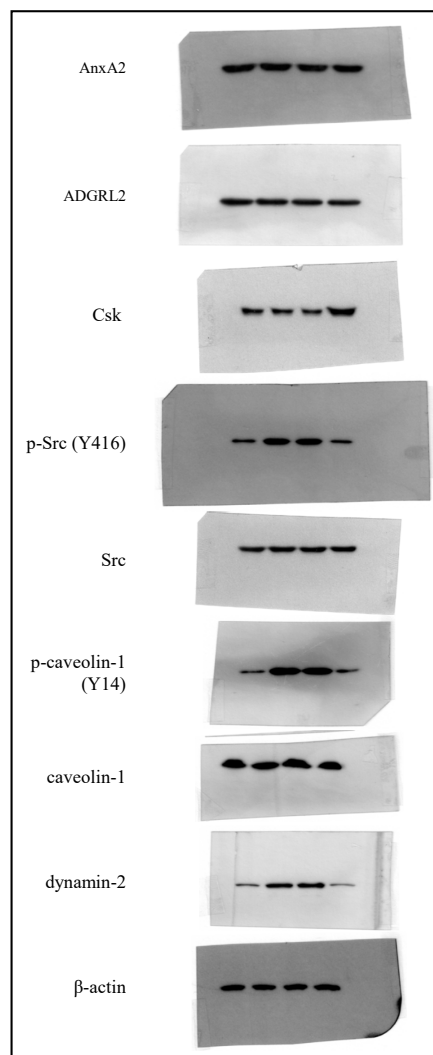

**Figure 5B**

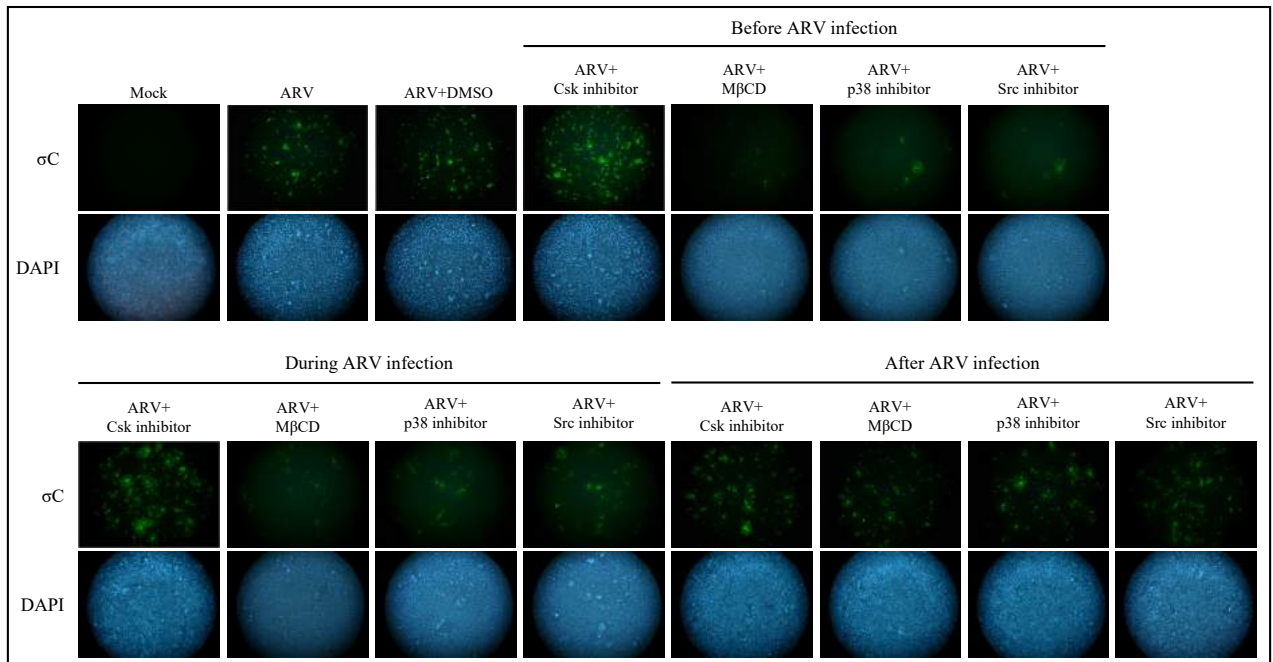

**Figure 6A**

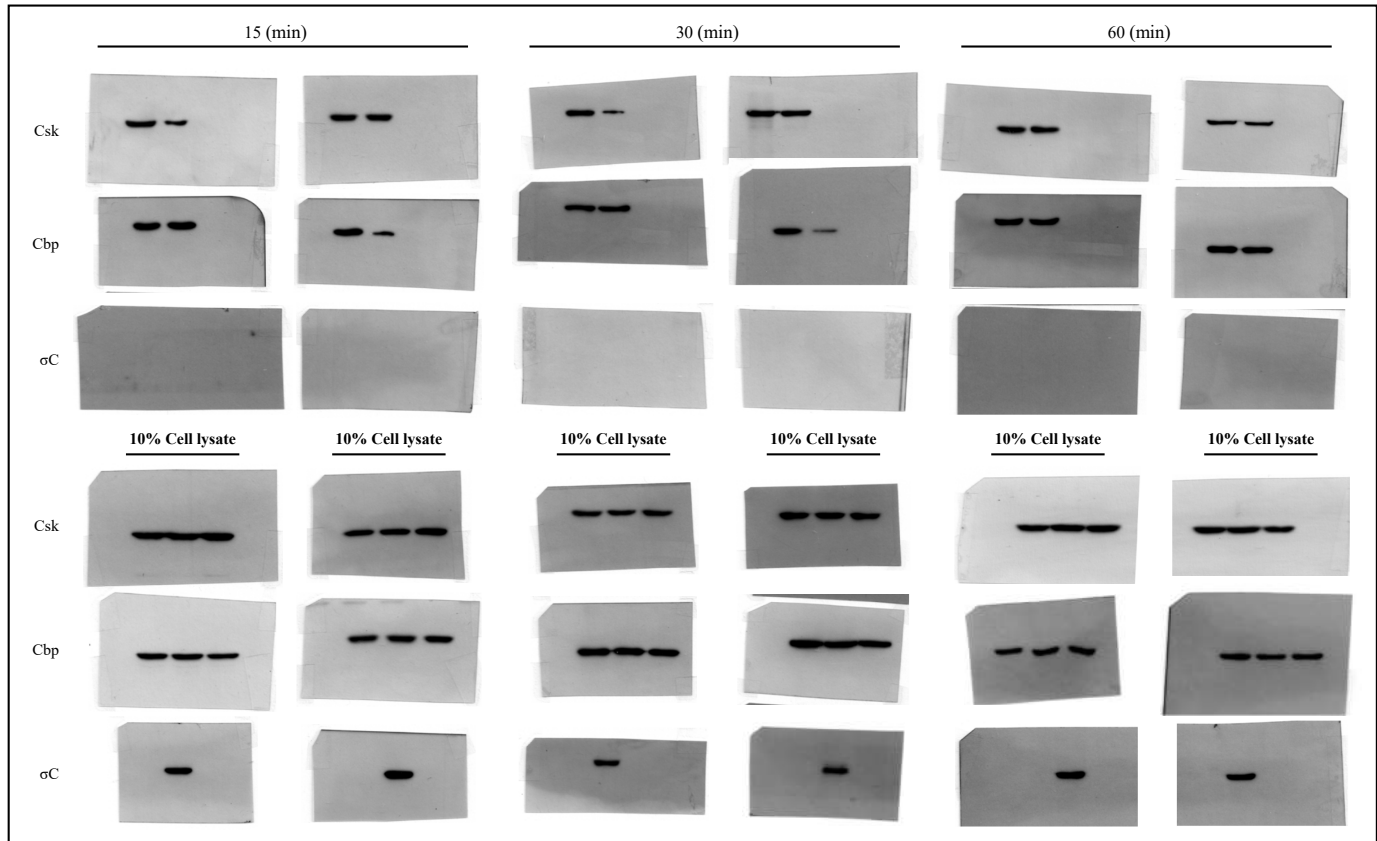

**Figure 6C**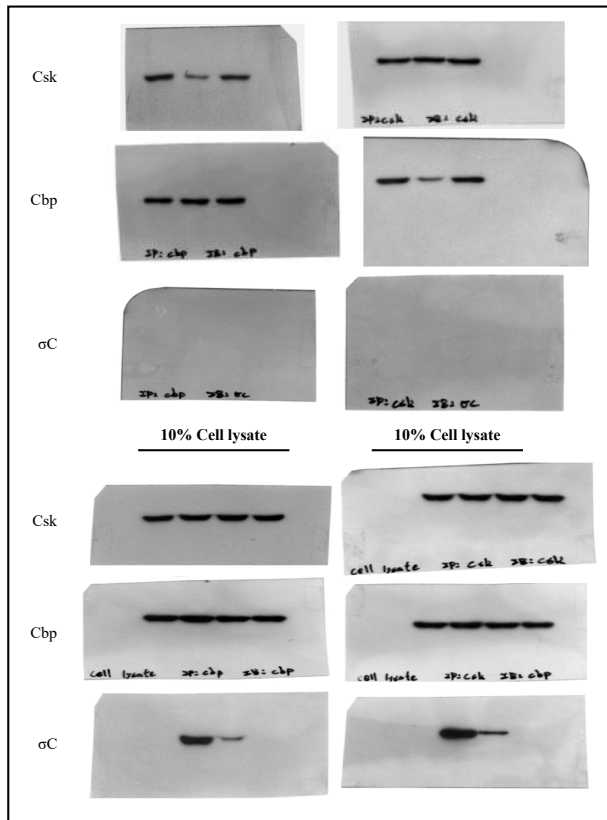**Figure 6D**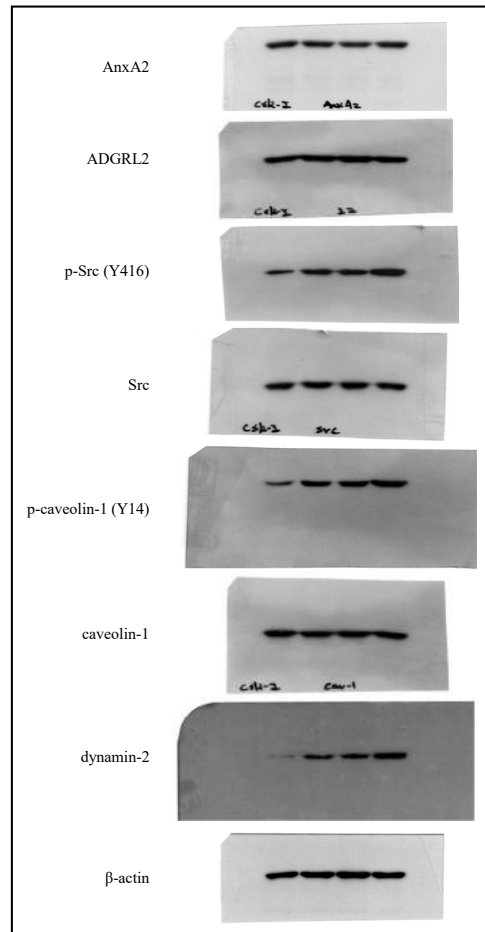**Figure S1A**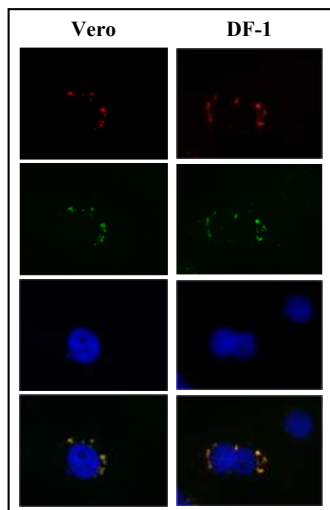**Figure S1B**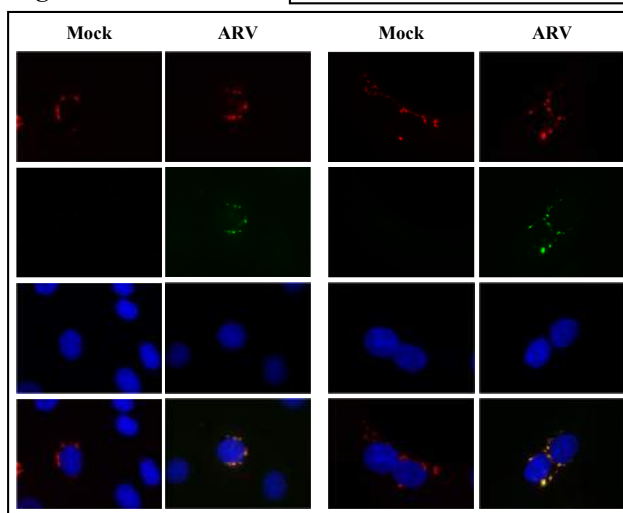**Figure S1C**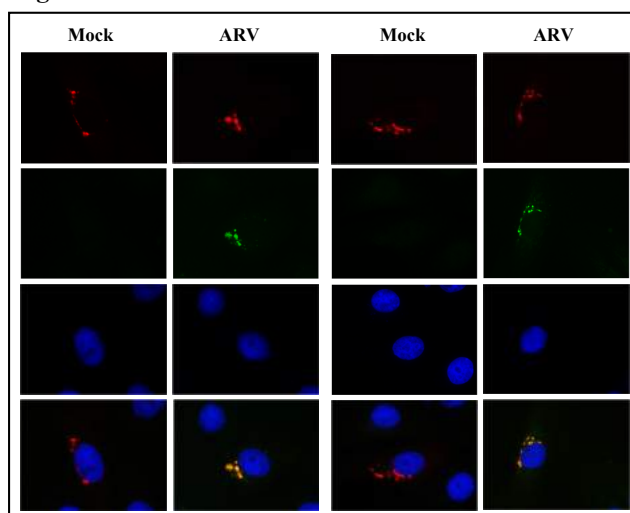

**Figure S4D**

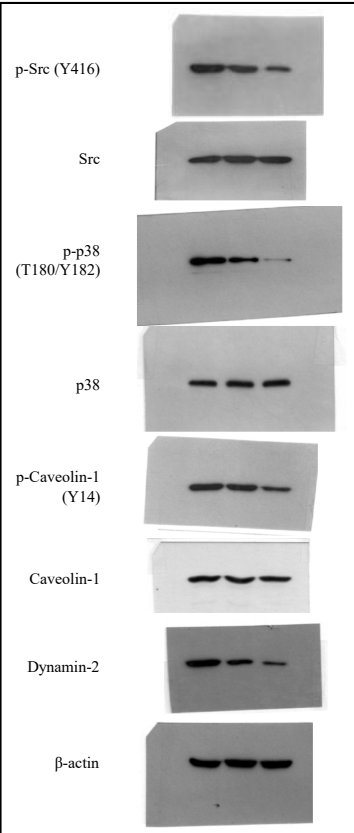

**Figure S4E**

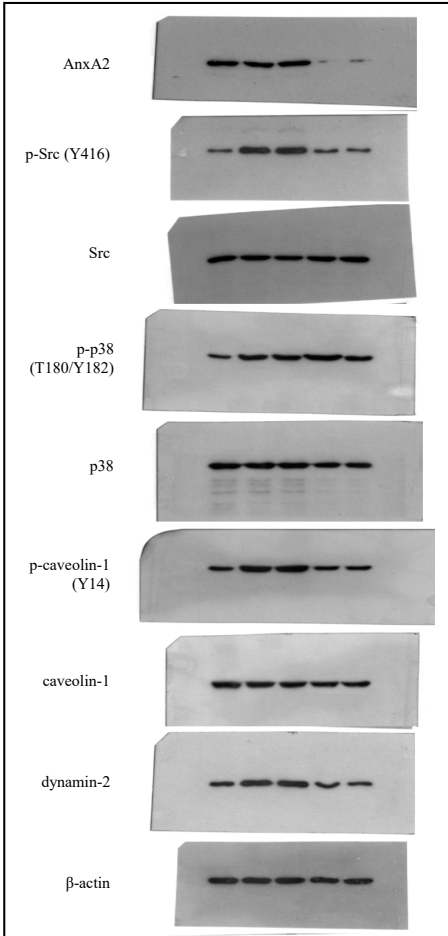

**Figure S4F**

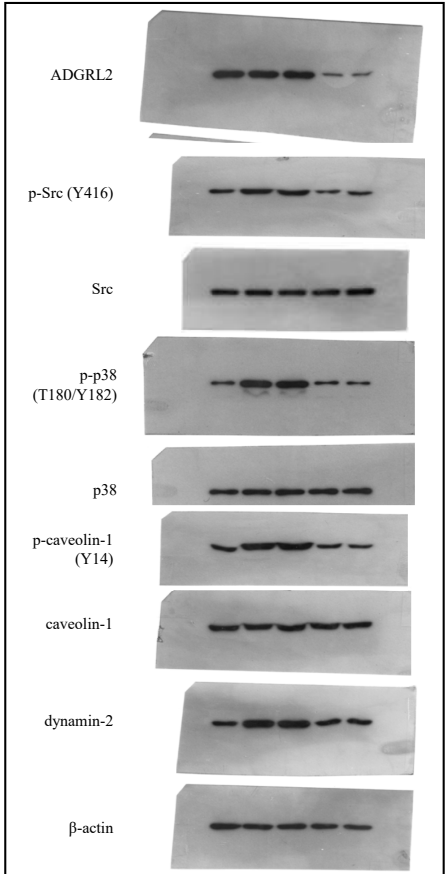



**Figure S5A**

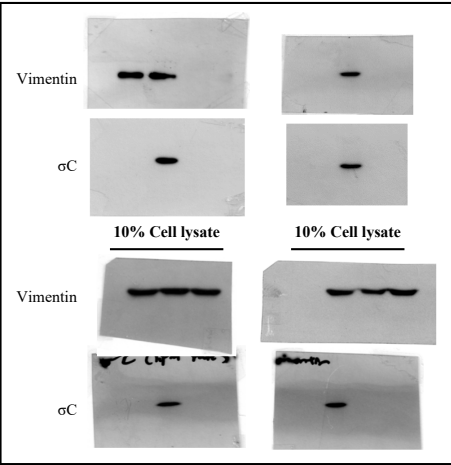

**Figure S5B**

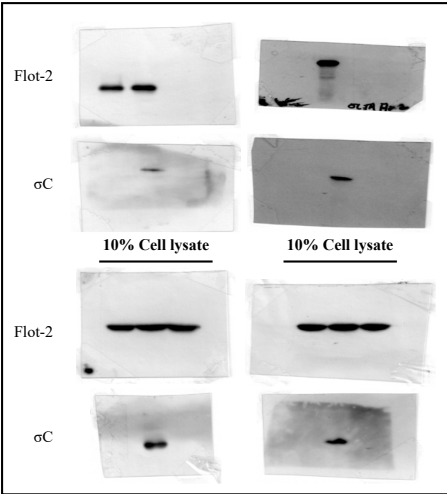

**Figure S5C**

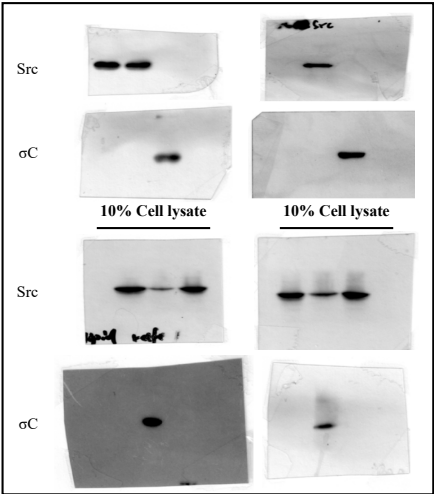

**Figure S5D**

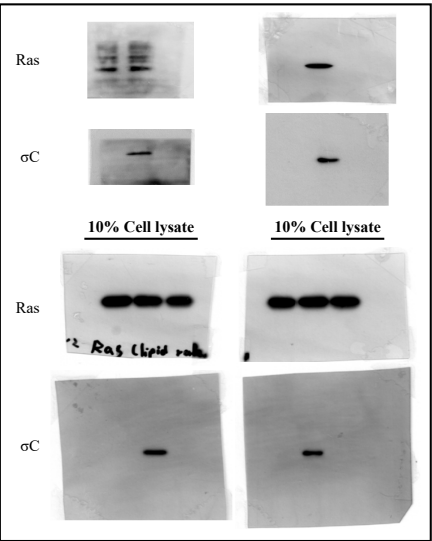

**Figure S5E**

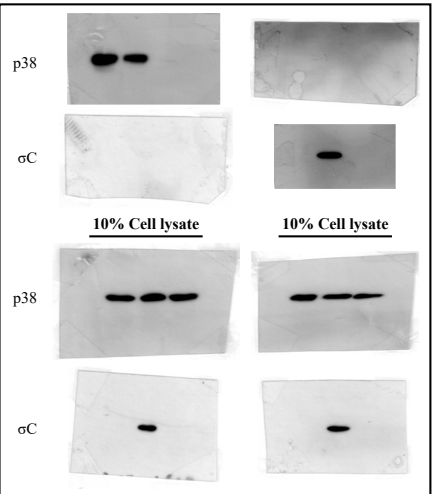

**Supplementary Fig. S8.** All original/uncropped blots or images.
